# Supplementary material for: Overexpression of Human sFLT1 in the Spongiotrophoblast Is Sufficient to Induce Placental Dysfunction and Fetal Growth Restriction in Transgenic Mice
Source: MDPI journal article supplement (doi:10.3390/ijms25042040), 2024-02-07
Supplement: s1 [file s1]

**Supplementary Table S1: Primers used for gene expression analysis, genotyping, and sex determination.**

| Gene                                   | NCBI number    | Primer sequence (5'→3')                                         | Product length (bp) |
|----------------------------------------|----------------|-----------------------------------------------------------------|---------------------|
| <b>Genotyping</b>                      |                |                                                                 |                     |
| <i>hsFLT1</i>                          | NM_001159920.2 | for: CAAGGACGTAAGTGAAGAGG<br>rev: TTTCTTCCCACAGTCCCAAC          | 465                 |
| <i>Col1a1</i>                          | /              | for: CCATCCCAACAATACATCACA<br>rev: TGGTTTCTTTGGGCTAGAGG         | 200                 |
| tTA                                    | /              | for: AAGGGAGCTGCAGTGGAGTA<br>rev-wt: CCGAAAATCTGTGGGAAGTC       | 297                 |
| <b>Sex determination</b>               |                |                                                                 |                     |
| <i>IL-3</i>                            | NM_010556.4    | for: GGGACTCCAAGCTTCAATCA<br>rev: TGGAGGAGGAAGAAAAGCAA          | 544                 |
| <i>Sry</i>                             | NM_011564.1    | for: TGGGACTGGTGACAATTGTC<br>rev: GAGTACAGGTGTGCAGCTCT          | 402                 |
| <b>Reference/Housekeeping gene</b>     |                |                                                                 |                     |
| <i>Gapdh</i>                           | XM_011241214.1 | for: ACAACTCACTCAAGATTGTCAGCA<br>rev: ATGGCATGGACTGTGGTCAT      | 121                 |
| <b>Glucose and glycogen metabolism</b> |                |                                                                 |                     |
| <i>Glut-1</i>                          | NM_011400.3    | for: GCTGTGCTTATGGGCTTCTC<br>rev: ACACCTGGGCAATAAGGATG          | 202                 |
| <i>Glut-3</i>                          | NM_011401.4    | for: GGAGGAGAACCCTGCATATGATA<br>rev: TGGCTTCATAGTCATCCTTTAGTAAC | 96                  |
| <i>Gyg</i>                             | NM_001355261.1 | for: TATACTCCTACCTCCCGGCA<br>rev: TTGACAAGGCCATGGTGTTG          | 223                 |
| <i>Gys1</i>                            | NM_030678.3    | for: CTGGCCGCTATGAGTTTTCC<br>rev: TGGGGTGTCCCATAGTTGT           | 194                 |
| <i>Cx26</i>                            | NM_008125.3    | for: ATGCTACGACCACCACTTCC<br>rev: TACGGACCTTCTGGGTTTTG          | 194                 |
| <b>Fatty acid transporters</b>         |                |                                                                 |                     |
| <i>Cd36</i>                            | NM_001159558.1 | for: CAGTGCAGAAACAATGGTTGTCT<br>rev: TGACATTTGCAGGTCTATCTACG    | 137                 |
| <i>Fabp</i>                            | NM_010174.2    | for: TTTGTCGGTACCTGGAAGCT<br>rev: CTGTCACCTCGTCGAACTCT          | 214                 |
| <i>Abca1</i>                           | NM_013454.3    | for: CGACCATGAAAGTGACACGC<br>rev: AGCACATAGGTCAGCTCGTG          | 117                 |
| <b>Amino acid transporter</b>          |                |                                                                 |                     |
| <i>Snat-1</i>                          | NM_001166458.1 | for: AGCACAGGGCGACATTCTCATC<br>rev: ACAGGTGGAACCTTTGTCTTCTTG    | 134                 |
| <i>Snat-2</i>                          | NM_175121.4    | for: ACAAATGGGTTGTGGTA<br>rev: CCTAGATTTCTCAGCAGTGACAATG        | 92                  |
| <b>Angiogenesis</b>                    |                |                                                                 |                     |
| <i>Flk-1</i>                           | NM_001363216.1 | for: GGCGGTGGTGACAGTATCTT<br>rev: GTCAGTACAGAGGCGATGA           | 162                 |

|                                             |                |                                                         |     |
|---------------------------------------------|----------------|---------------------------------------------------------|-----|
| Flt-4                                       | NM_008029.3    | for: GTGGCTGTGAAGATGCTGAA<br>rev: TGACACGCAAGAAGTTGGAG  | 199 |
| Plgf                                        | XM_011244016.1 | for: CGTCCTGTGTCCTTCTGAGT<br>rev: CCTCTTCCTCTTCCCCTTGG  | 200 |
| Vegfa                                       | NM_001025257.3 | for: CAGGCTGCTGTAACGATGAA<br>rev: GCATTCACATCTGCTGTGCT  | 140 |
| Vegfb                                       | NM_011697.3    | for: AACACAGCCAATGTGAATGC<br>rev: GGAGTGGGATGGATGATGTC  | 157 |
| Vegfc                                       | NM_009506.2    | for: CAAGGCTTTTGAAGGCAAAG<br>rev: TCCCCTGTCCTGGTATTGAG  | 159 |
| Cd31                                        | NM_001032378.2 | for: ATGACCCAGCAACATTCACA<br>rev: CACAGAGCACCGAAGTACCA  | 200 |
| hsFLT1                                      | XM_017020485.1 | for: AATCATTCCGAAGCAAGGTG<br>rev: TTTCTTCCCACAGTCCCAAC  | 219 |
| <b>Hypoxia markers</b>                      |                |                                                         |     |
| HO-1                                        | NM_010442.2    | for: CACGCATATACCCGCTACCT<br>rev: CCAGAGTGTTTCATTCGAGCA | 175 |
| Hif1 $\alpha$                               | NM_001313920.1 | for: TCAAGTCAGCAACGTGGAAG<br>rev: TATCGAGGCTGTGTCGACTG  | 198 |
| Hif2 $\alpha$                               | NM_010137.3    | for: GCAAGCCTTCCAAGACACAA<br>rev: CCTGAGCTCCTGGTAGATGG  | 228 |
| Phd1                                        | NM_001357767.1 | for: TGCATCAAGTGGAGGAGGAG<br>rev: GATGCTCCTGGACGGTGATA  | 246 |
| Phd2                                        | NM_001363475.1 | for: AGGTGAGAAAGGTGTGAGGC<br>rev: CACAGTACAGTCCAGCAGA   | 228 |
| <b>Trophoblast and glycogen cell marker</b> |                |                                                         |     |
| Plap                                        | NM_007431.3    | for: TCAGGGCAATGAGGTCACAT<br>rev: CCTCTGGTGGCATCTCCTTA  | 161 |
| Igf-2                                       | NM_001315489.1 | for: ACCTTCCAGCCTTTTCCTGTC<br>rev: GTAGACACGTCCCTCTCGGA | 357 |
| Igf-2R                                      | NM_010515.2    | for: TATGTGAACGGCTCTGCTTG<br>rev: GAGCAAGCCTGGTCTGTTTC  | 200 |
| Pcdh12                                      | NM_017378.2    | for: CTTCACTCATCACGCTCAA<br>rev: TGCCCTCTGTCCTCTGCTAT   | 197 |
| Gcm1                                        | NM_008103.3    | for: TGCTCACCTATGGCTCTCCT<br>rev: AAAATTCTGCCAAGCCCTTT  | 201 |
| <b>Cytokine marker</b>                      |                |                                                         |     |
| Tnfa                                        | NM_001278601.1 | for: CGTCAGCCGATTTGCTATCT<br>rev: CGGACTCCGCAAAGTCTAAG  | 206 |

**Supplementary Table S2: Antibodies used for Immunoblot and immunohistochemistry.**

| Primary antibody                             | Dilution                    | Host   | Company                                  | Reference number |
|----------------------------------------------|-----------------------------|--------|------------------------------------------|------------------|
| Anti-CD31 <sup>a</sup>                       | 1:200 in PBS/BSA (0.5 %)    | Rat    | Dianova (Hamburg, Germany)               | DIA-310          |
| Anti-CD31 <sup>b</sup>                       | 1:5000 in 2 % milk powder   | Rat    | Dianova (Hamburg, Germany)               | DIA-310          |
| Anti-CX26 <sup>b</sup>                       | 1:350 in 2 % milk powder    | Rabbit | Santa Cruz Biotechnology (Dallas, USA)   | #710500          |
| Anti-FLK1 <sup>b</sup>                       | 1:1000 in 5 % milk powder   | Rabbit | Cell Signaling Technology (Danvers, USA) | #2479            |
| Anti-FLT4 <sup>b</sup>                       | 1:200 in 0.5 % milk powder  | Goat   | R&D Systems (Minneapolis, USA)           | AF743            |
| Anti-GLUT1 <sup>b</sup>                      | 1:3000 in 2 % milk powder   | Rabbit | Novus Biologicals (Centennial, USA)      | NB110-39113      |
| Anti-TNF $\alpha$ <sup>b</sup>               | 1:1000 in 2 % milk powder   | Rabbit | Abcam (Cambridge, GB)                    | ab183218         |
| Peroxidase anti- $\beta$ -actin <sup>b</sup> | 1:20000 in TBS-T            | Mouse  | Sigma-Aldrich (St. Louis, USA)           | A3854            |
| Secondary antibody                           | Dilution                    | Host   | Company                                  | Reference number |
| Anti-goat IgG-HRP <sup>b</sup>               | 1:5000 in 0.5 % milk powder | Donkey | Invitrogen (Karlsruhe, Germany)          | AB_10990162      |
| Anti-rabbit IgG-HRP <sup>b</sup>             | 1:5000 in 0.5 % milk powder | Goat   | Dako (California, USA)                   | p0448            |
| Anti-rat IgG-HRP <sup>b</sup>                | 1:5000 in 0.5 % milk powder | Goat   | Invitrogen (Karlsruhe, Germany)          | AB_10965062      |
| Anti-rat IgG-Biotin <sup>a</sup>             | 1:100 in 0.5 % PBS/BSA      | Donkey | Invitrogen (Karlsruhe, Germany)          | A18743           |

<sup>a</sup> used for Immunohistochemistry<sup>b</sup> used for Immunoblot analysis.

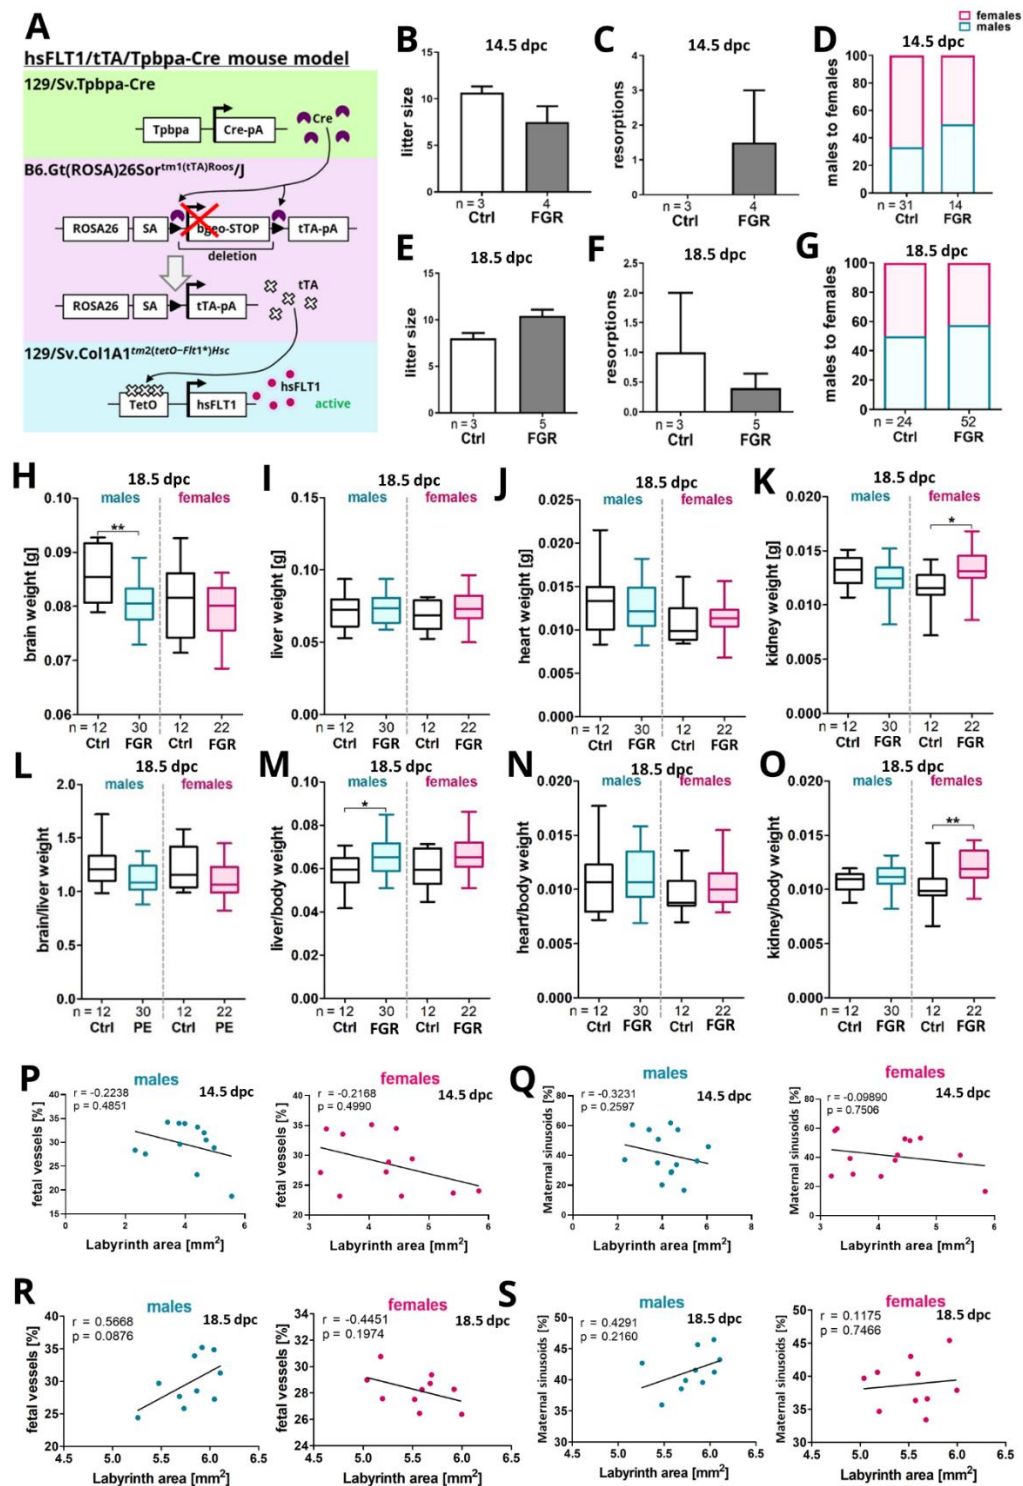

**Supplementary Figure S1. Impact of placenta-specific hsFLT1 overexpression on phenotype of dams and fetuses at 14.5 and 18.5 dpc.** **A**) Schematic depiction of the interaction between all three transgenes necessary to induce hsFLT1 overexpression in the hsFLT1/tTA/Tpba-Cre mouse model. **B/C**) At 14.5 dpc the litter size was higher in the control group (**B**), and resorptions were only observed in the FGR group (**C**). **D**) More females were born in the control group whereas the sex ratio in the FGR group was equal. **E/F**) At 18.5 dpc the litter size was higher in the FGR group (**E**), and resorptions were only observed in both groups (**F**). **G**) No change in sex ratio was observed at 18.5 dpc. **H-O**) Organ weights and organ/bodyweight ratios at 18.5 dpc: The brain weight (**H**) was significantly reduced in the FGR male group and the kidney weight was significantly increased in the female FGR group (**K**)

whereas the liver and heart weights did not change between the groups (**I, J**). The liver to body weight was significantly increased in males in the FGR group (**M**) and the kidney/body ratio was significantly increased in the females in the FGR group (**O**). The brain/liver weight and the heart/body weight did not change between the groups (**L, N**).  $\mu\text{m}$  **P/Q**) No Correlation of the percentage of fetal vessels (**P**) and maternal sinusoids (**Q**) with the labyrinth area was observed at 14.5 dpc **R**) At 18.5 dpc the percentage of fetal vessels correlated by trend ( $p=0.0876$ ) to the labyrinth area in male FGR placentas but not in females. **S**) Whereas the percentage of maternal sinusoids did not correlate to the labyrinthine area in male and female FGR group at 18.5 dpc. Data is presented in a box plot with median, interquartile range and lower/upper extreme or in a bar graph with standard error. n=number of dams (**B/C, E/F**), fetuses (**D,G**) or fetal organs (**H-O**). \*  $p \leq 0.05$  and \*\*  $\leq 0.01$  as determined by the Mann-Whitney test. Scale bar = 400 .

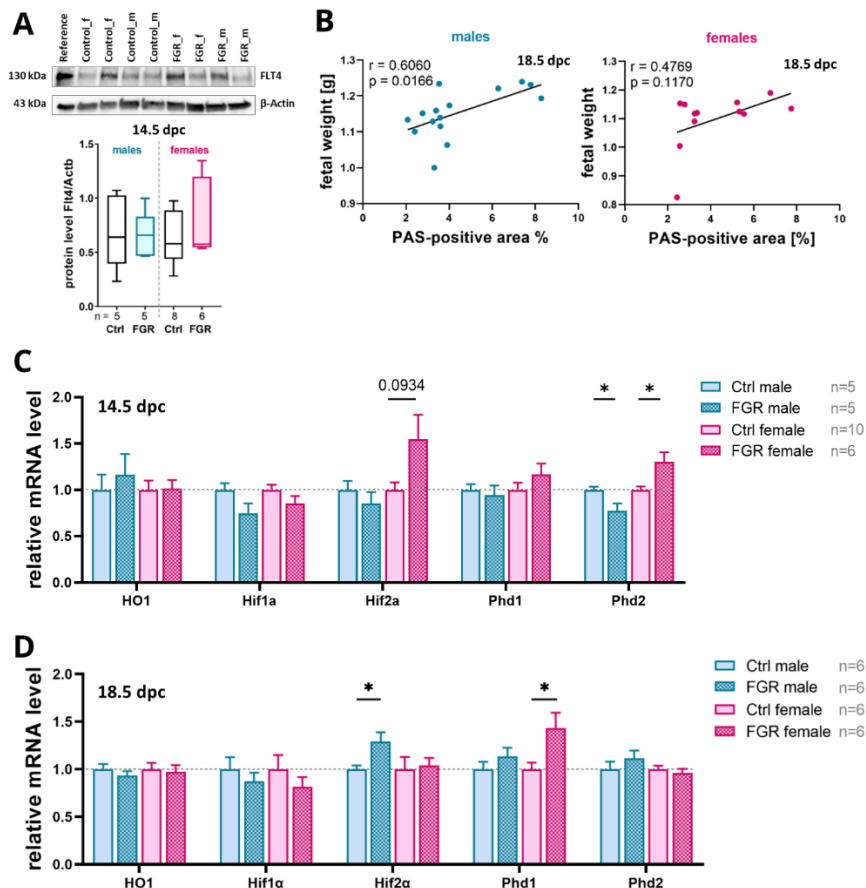

**Supplementary Figure S2: Impact of placenta-specific hsFLT1 overexpression on the lymphangiogenic marker Flt4 and hypoxia-induced gene expression at 14.5 and 18.5 dpc.** **A)** FLT4 protein level at 14.5 dpc was not changed upon placenta-specific hsFLT1 expression as shown by Western Blot analysis. **B)** The fetal weight significantly correlate to the percentage of PAS-stained area (glycogen containing cells) in the spongiotrophoblast area of male placentas but not in female placentas. **C)** Transcript levels of hypoxia/oxidative stress markers in placentas at 14.5 dpc. Only *Hif2a* was increased by trend in the female FGR groups and *Phd2* was significantly decreased in male FGR and increased in female FGR group compared to controls. **D)** At 18.5 dpc *Hif2a* mRNA was significantly increased in male FGR and *Phd1* mRNA in female FGR group. The mRNA levels were determined by qPCR and normalized to the housekeeping gene *Gapdh*. Data is presented in a box plot with median, interquartile range and lower/upper extreme or in a bar graph with standard error. n=number of placentas. \*  $p \leq 0.05$  as determined by the Mann-Whitney test. Statistical analysis of correlation were calculated by Spearman r test.
